# Supplementary material for: Efficient asymmetrical silicon–metal dimer electrocatalysts for the nitrogen reduction reaction
Source: Royal Society of Chemistry journal article supplement (doi:10.1039/d2cp05959b), 2023-01-01
Supplement: d2cp05959b1.pdf [file d2cp05959b1.pdf]

**Electronic Supplementary Information (ESI) for**  
**Efficient Asymmetrical Silicon-Metal Dimer Electrocatalysts for Nitrogen**  
**Reduction Reaction**

Chuangwei Liu,<sup>1</sup> Haoren Zheng,<sup>1</sup> Tianyi Wang,<sup>1,2</sup> Xiaoli Zhang,<sup>3</sup> Zhongyuan Guo,<sup>2,\*</sup> Hao Li <sup>2,\*</sup>

<sup>1</sup> Key Lab for Anisotropy and Texture of Materials, School of Materials Science and Engineering, Northeastern University, Shenyang 110819, China.

<sup>2</sup> Advanced Institute for Materials Research (WPI-AIMR), Tohoku University, Sendai 980-8577, Japan.

<sup>3</sup> School of Material Science and Engineering, Zhengzhou University, Zhengzhou 450001, China.

**Keywords:** *g*-C<sub>3</sub>N<sub>4</sub>; Si-Metal dimer; ENRR; Electrocatalysis; DFT

*\*Corresponding author:*

**Dr. Zhongyuan Guo**

Email: [zhongyuanguo2022@163.com](mailto:zhongyuanguo2022@163.com)

**Prof. Hao Li**

Email: [li.hao.b8@tohoku.ac.jp](mailto:li.hao.b8@tohoku.ac.jp)

## 1. Catalysts models

A 2D (2×2) supercell of  $g\text{-C}_3\text{N}_4$  was built and then optimized to the stable structure ( $a = 14.36$ ,  $b = 14.35$ ,  $\alpha = \beta = 90^\circ$ ,  $\gamma = 120^\circ$ ), including the lattice constant. Then, heteroatom (Si or Metal) was substituted into the  $N_{v1}$  site and the optimized catalysts models were denoted as  $\text{Si}@C_3N_4$  (shown in Fig. 1a) and  $M@C_3N_4$  (including  $\text{Mo}@C_3N_4$  and  $\text{Ru}@C_3N_4$  as shown in Fig. S8). Additionally, Si and Metal were both substituted into two  $N_{v1}$  sites to build asymmetrical dimer catalysts and the optimized catalyst models were denoted as  $\text{SiM}@C_3N_4$ . The vacuum thickness of catalyst models along the  $z$  direction is set to 20 Å to avoid false interactions between periodic structures during geometry optimizations.

## 2. Scheme of ENRR on $\text{Si}@C_3N_4$

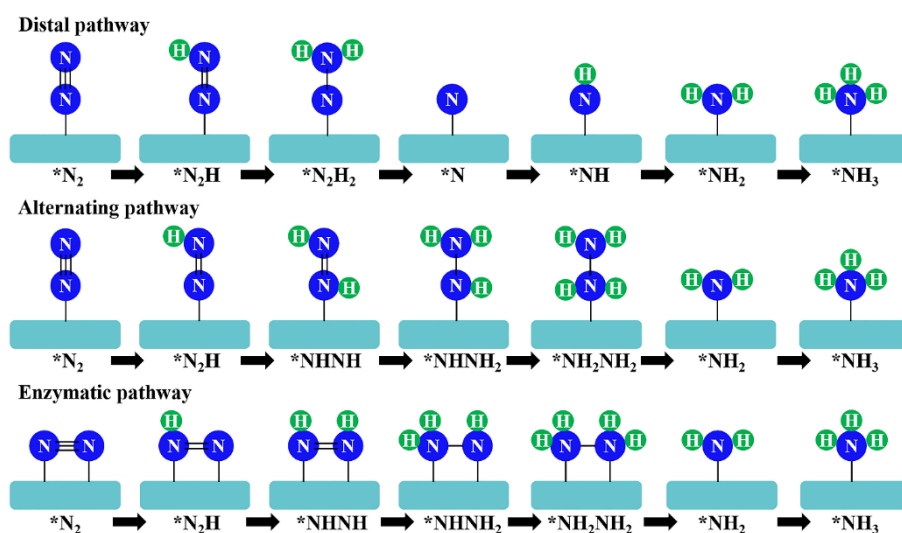

**Fig. S1** The widely-proposed ENRR mechanisms, including distal, alternating and enzymatic ones.

### 3. Interstitial Si-doping into $g\text{-C}_3\text{N}_4$

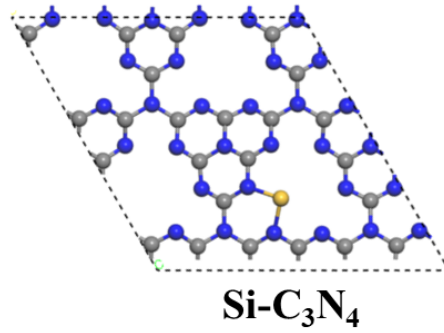

**Fig. S2** The configuration of optimized Si-C<sub>3</sub>N<sub>4</sub>.

The formation energy of the configuration of Si-C<sub>3</sub>N<sub>4</sub> is -0.02 eV, derived from the  $E_f = E_{\text{Si-C}_3\text{N}_4} - \mu_{\text{Si}} - E_{g\text{-C}_3\text{N}_4}$ , where  $E_{\text{Si-C}_3\text{N}_4}$ , and  $E_{g\text{-C}_3\text{N}_4}$  represent the electronic energies of the catalyst and the pristine  $g\text{-C}_3\text{N}_4$  substrate, and  $\mu_{\text{Si}}$  refers to the chemical potential of Si, obtained by  $1/n * E_{\text{Si-cell}}$ . In comparison with the above configuration, the Si-doping into the Nv site (N<sub>v1</sub>), named as Si@C<sub>3</sub>N<sub>4</sub>, is more energetically favorable.

#### 4. SiM@C<sub>3</sub>N<sub>4</sub> models

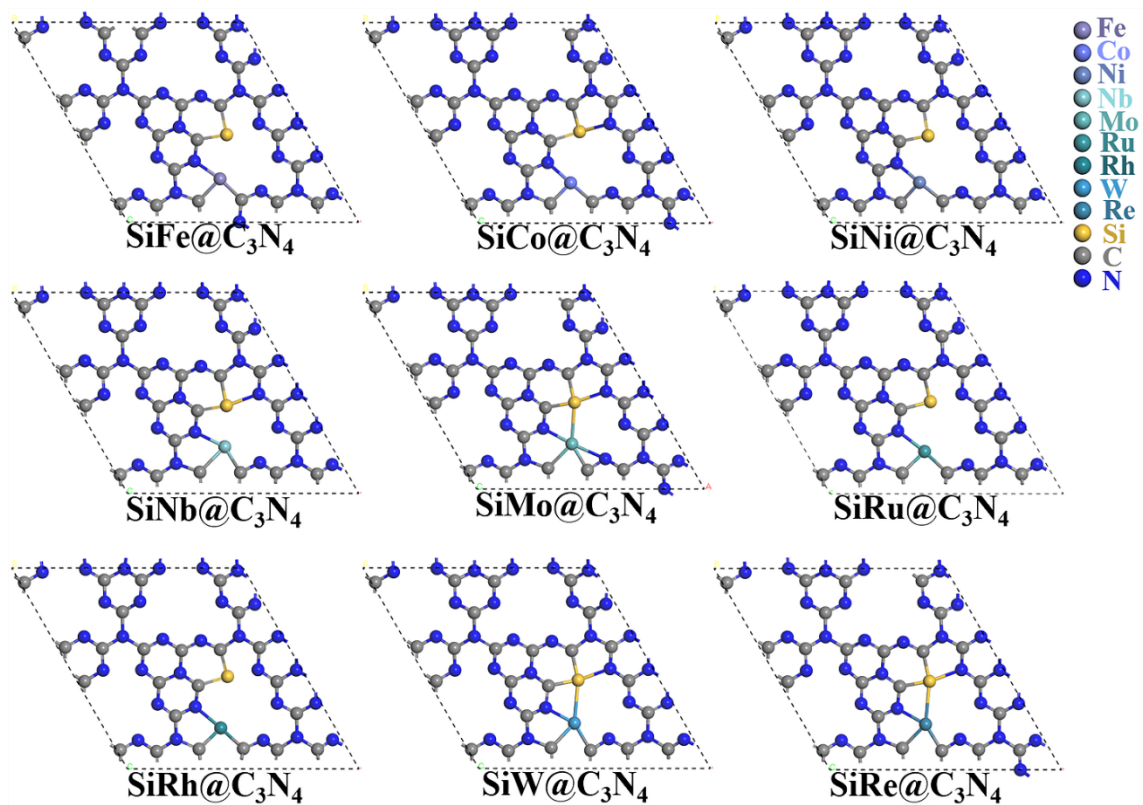

Fig. S3 The concept catalysts of SiM@C<sub>3</sub>N<sub>4</sub>.

## 5. Characteristics of SiM@C<sub>3</sub>N<sub>4</sub>

**Table S1** Characteristics of SiM@C<sub>3</sub>N<sub>4</sub>.

| Catalysts                          | Adsorption energy |         | Binding energies<br>of dopants, $E_b$ /eV | Cohesive energies,<br>$E_{co}$ /eV | Si-M bond<br>length/Å |
|------------------------------------|-------------------|---------|-------------------------------------------|------------------------------------|-----------------------|
|                                    | $E_{ads}$ /eV     |         |                                           |                                    |                       |
|                                    | end-on            | side-on |                                           |                                    |                       |
| Si@C <sub>3</sub> N <sub>4</sub>   | 0.54              | 1.09    | -6.51                                     | -4.55 ( $E_{co,Si}$ )              | —                     |
| Mo@C <sub>3</sub> N <sub>4</sub>   | -0.77             | 0.01    | -6.98                                     | -5.86 ( $E_{co,Mo}$ )              | —                     |
| Ru@C <sub>3</sub> N <sub>4</sub>   | -0.24             | —       | -7.95                                     | -6.77 ( $E_{co,Ru}$ )              | —                     |
| SiFe@C <sub>3</sub> N <sub>4</sub> | —                 | 0.16    | -13.51                                    | -5.14 ( $E_{co,Fe}$ )              | 2.82                  |
| SiCo@C <sub>3</sub> N <sub>4</sub> | —                 | -0.04   | -13.91                                    | -5.02 ( $E_{co,Co}$ )              | 3.23                  |
| SiNi@C <sub>3</sub> N <sub>4</sub> | —                 | 0.43    | -14.08                                    | -4.70 ( $E_{co,Ni}$ )              | 2.99                  |
| SiNb@C <sub>3</sub> N <sub>4</sub> | —                 | 0.12    | -15.44                                    | -6.78 ( $E_{co,Nb}$ )              | 2.86                  |
| SiMo@C <sub>3</sub> N <sub>4</sub> | —                 | -0.38   | -14.18                                    | -5.86 ( $E_{co,Mo}$ )              | 2.67                  |
| SiRu@C <sub>3</sub> N <sub>4</sub> | —                 | -0.29   | -14.53                                    | -6.77 ( $E_{co,Ru}$ )              | 3.11                  |
| SiRh@C <sub>3</sub> N <sub>4</sub> | —                 | 0.34    | -14.31                                    | -5.66 ( $E_{co,Rh}$ )              | 3.24                  |
| SiW@C <sub>3</sub> N <sub>4</sub>  | —                 | 0.06    | -15.58                                    | -8.59 ( $E_{co,W}$ )               | 2.68                  |
| SiRe@C <sub>3</sub> N <sub>4</sub> | —                 | —       | -15.09                                    | -7.80 ( $E_{co,Re}$ )              | 2.67                  |

## 6. N<sub>2</sub> adsorption on SiRe@C<sub>3</sub>N<sub>4</sub> model

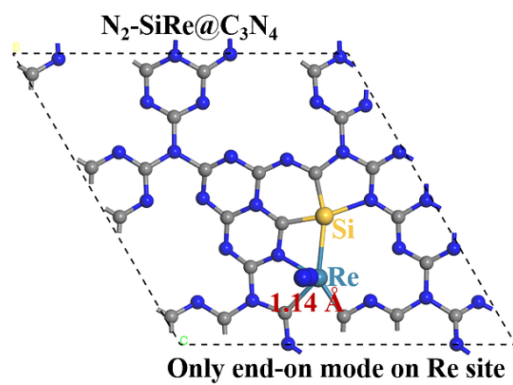

**Fig. S4** N<sub>2</sub> adsorption on SiRe@C<sub>3</sub>N<sub>4</sub>.

## 7. Adsorption kinetics of $N_2$ on $SiM@C_3N_4$

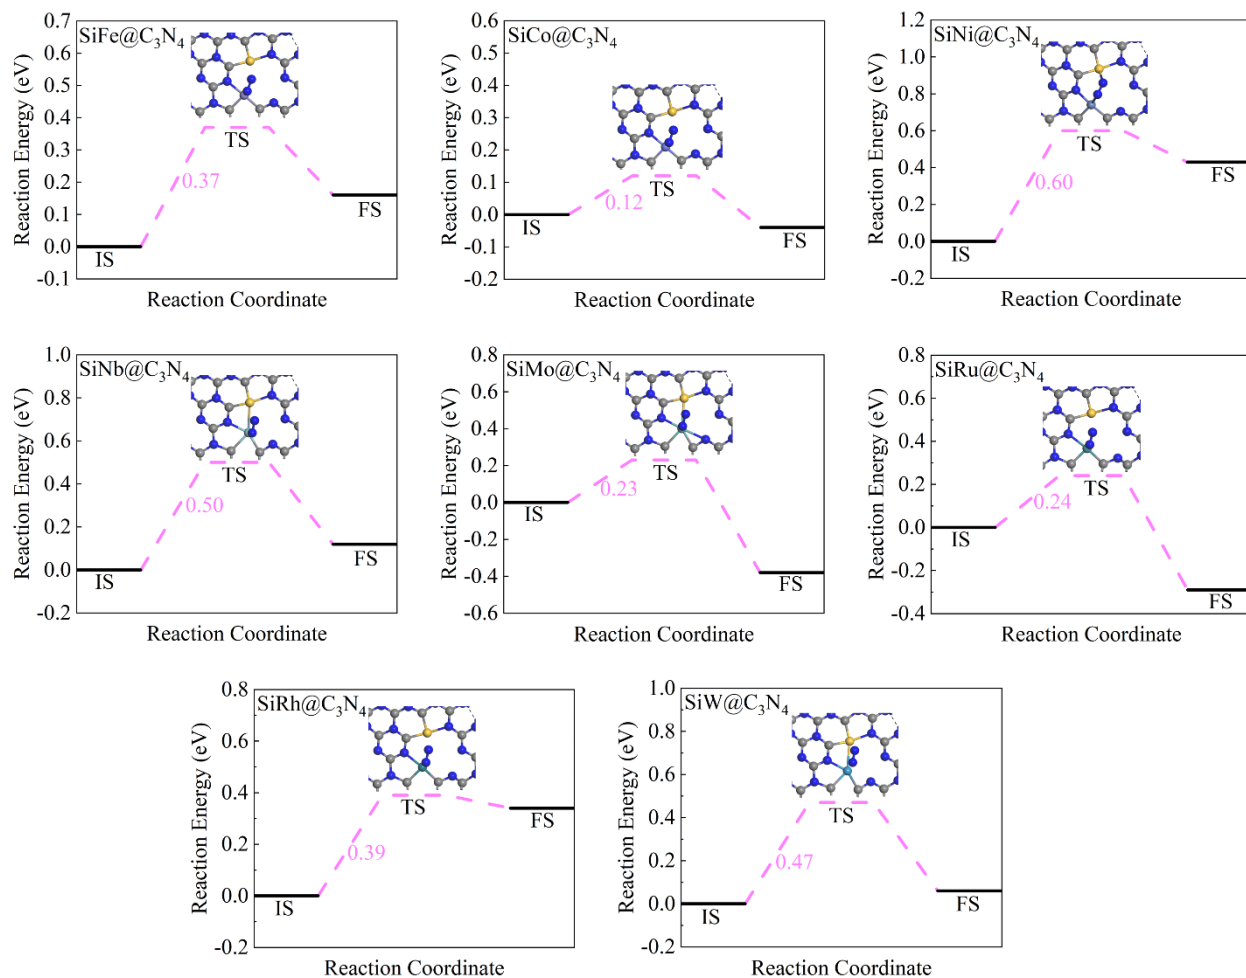

**Fig. S5** The kinetics analysis of  $N_2$  adsorption on  $SiM@C_3N_4$  (inserts are the transition states). It is noticed that the TS was not analyzed for  $SRe@C_3N_4$  because  $N_2$  can merely be activated in the end-on configuration. The 'IS' and 'FS' terms refer to the initial and final states during the adsorption.

## 8. ENRR mechanisms on dimer catalysts

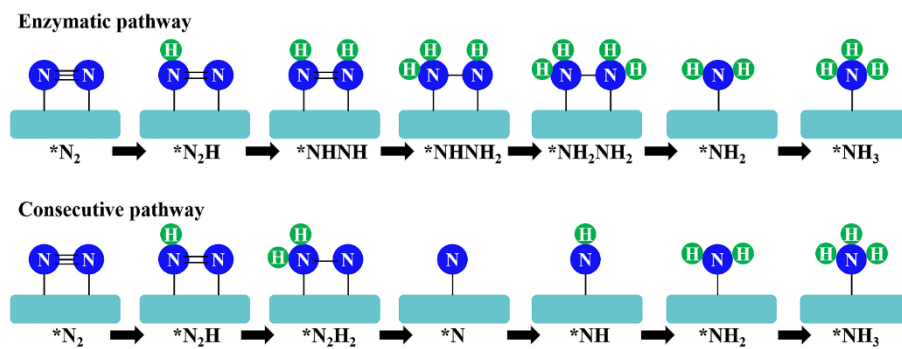

Fig. S6 The ENRR mechanisms on dimer catalysts.



## 9. ENRR pathways on SiRu@C<sub>3</sub>N<sub>4</sub>

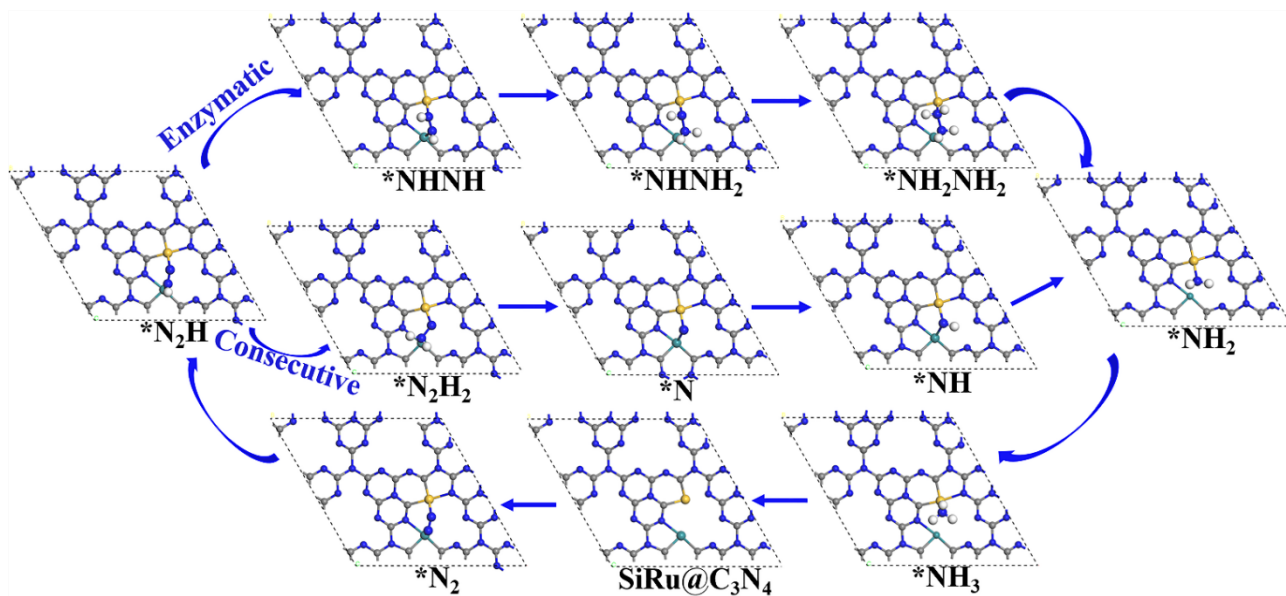

Fig. S7 ENRR enzymatic and consecutive pathways on SiRu@C<sub>3</sub>N<sub>4</sub>.

10.  $^*N_2H$  on  $SiMo@C_3N_4$  and  $SiRu@C_3N_4$

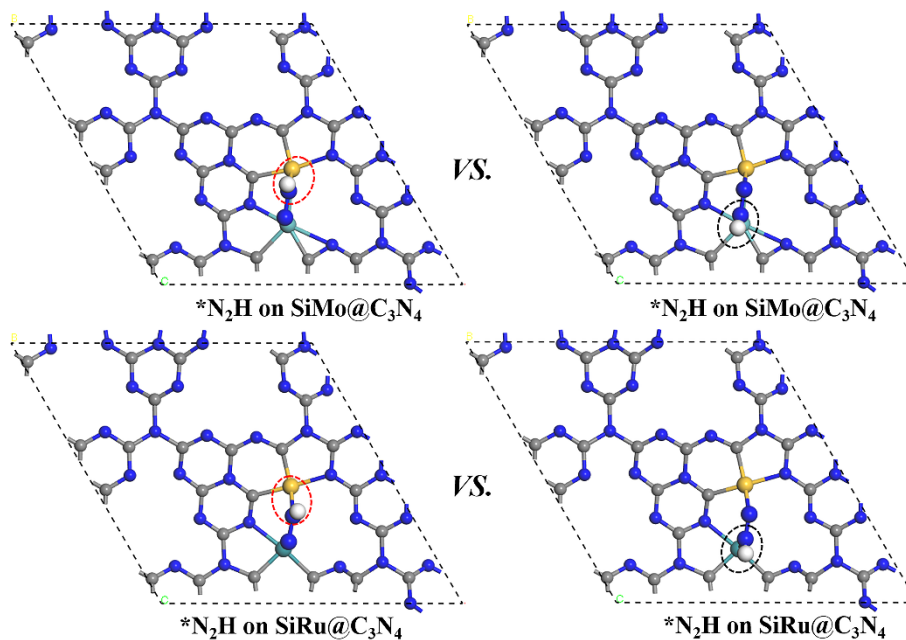

**Fig. S8** The Si site *VS.* metal site (Mo/Ru) for the adsorption of  $^*N_2H$ : the  $H^+/e^-$  pair tends to attack the N adatoms bound to the metal site energetically. The dash circles indicate different H adsorption sites on N adatom.

### 11. Mo@C<sub>3</sub>N<sub>4</sub> and Ru@C<sub>3</sub>N<sub>4</sub>

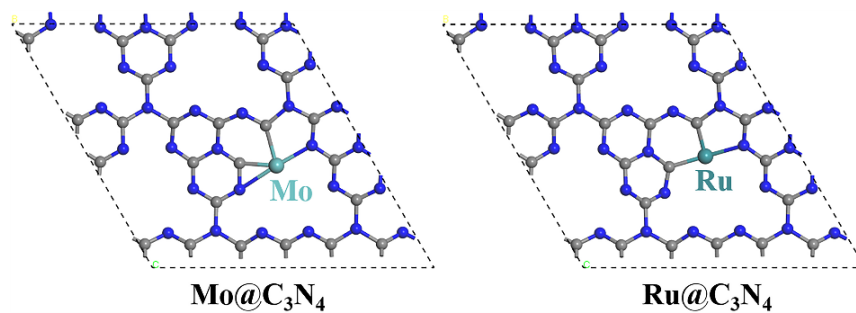

**Fig. S9** The single-atom Mo/Ru catalysts supported on *g*-C<sub>3</sub>N<sub>4</sub>, named Mo@C<sub>3</sub>N<sub>4</sub> and Ru@C<sub>3</sub>N<sub>4</sub>.

## 12. N<sub>2</sub> adsorption on Mo@C<sub>3</sub>N<sub>4</sub> and Ru@C<sub>3</sub>N<sub>4</sub>

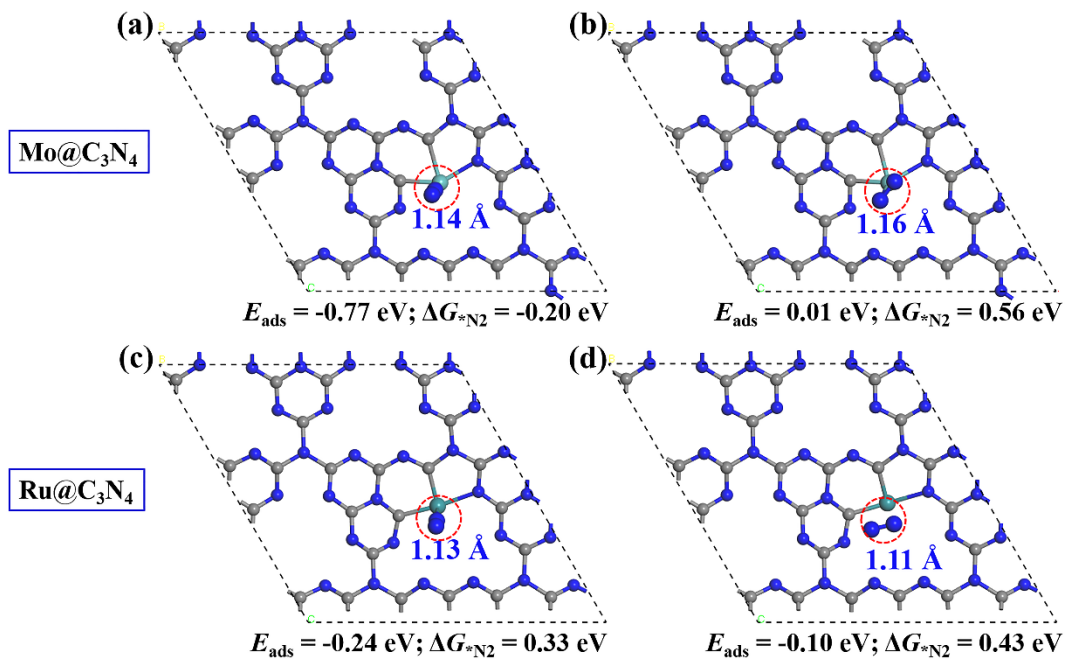

**Fig. S10** The adsorption configurations of \*N<sub>2</sub> on Mo@C<sub>3</sub>N<sub>4</sub> and Ru@C<sub>3</sub>N<sub>4</sub> with N-N bond lengths and energy changes.

### 13. ENRR on $\text{Mo@C}_3\text{N}_4$ and $\text{Ru@C}_3\text{N}_4$

(a)

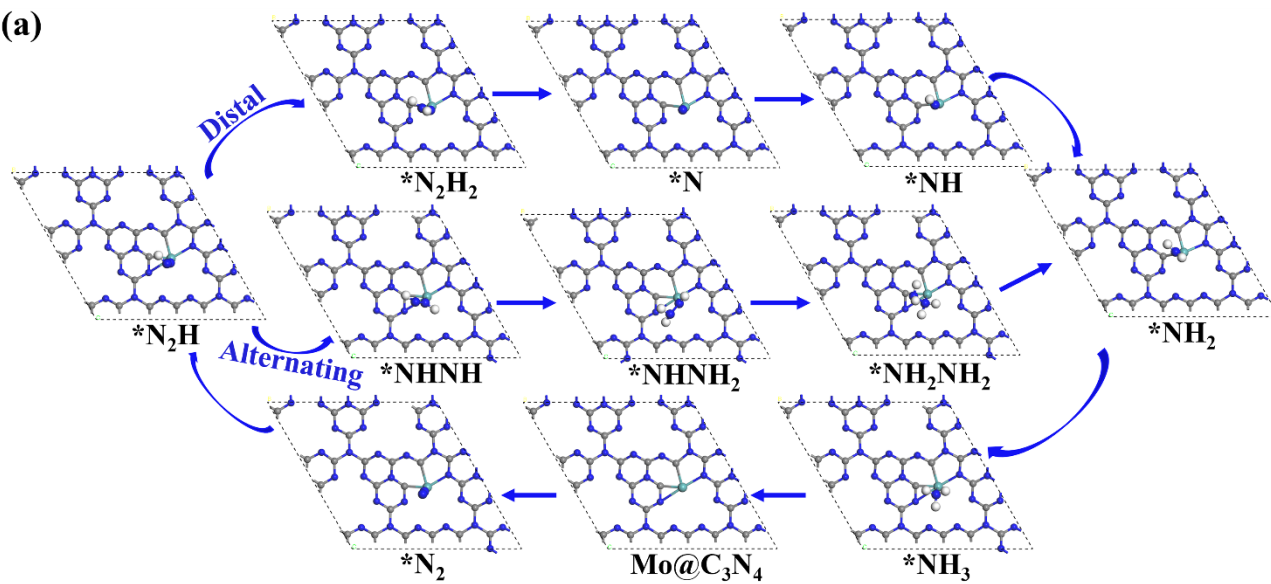

(b)

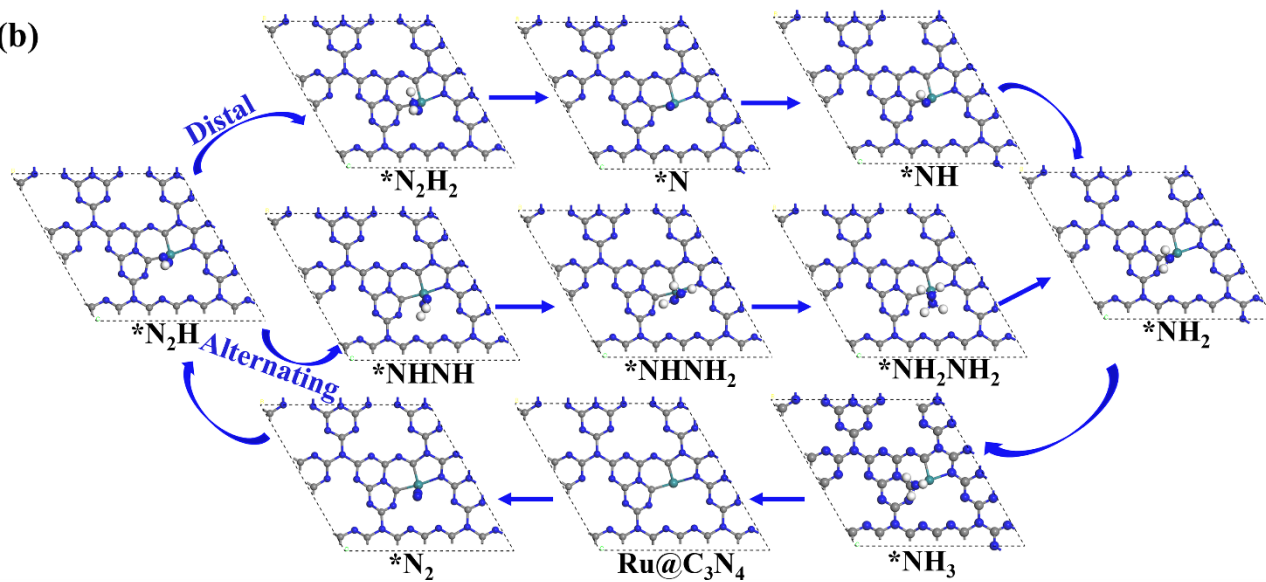

**Fig. S11** ENRR intermediates along the distal and alternating pathways on (a)  $\text{Mo@C}_3\text{N}_4$  and (b)  $\text{Ru@C}_3\text{N}_4$ .

## 14. Hirshfeld charge and N-N bond length analyses

**Table S2** The Hirshfeld charge and N-N bond length analyses towards \*N<sub>2</sub>.

| Catalysts                          | N-N bond/Å |         | Hirshfeld charges/e |         |
|------------------------------------|------------|---------|---------------------|---------|
|                                    | End-on     | Side-on | End-on              | Side-on |
| Si@C <sub>3</sub> N <sub>4</sub>   | 1.13       | 1.21    | 0.06                | -0.14   |
| Mo@C <sub>3</sub> N <sub>4</sub>   | 1.14       | 1.16    | -0.13               | —       |
| Ru@C <sub>3</sub> N <sub>4</sub>   | 1.13       | —       | -0.01               | —       |
| SiMo@C <sub>3</sub> N <sub>4</sub> | —          | 1.21    | —                   | -0.20   |
| SiRu@C <sub>3</sub> N <sub>4</sub> | —          | 1.20    | —                   | -0.18   |

## 15. DOS and orbital analyses for N<sub>2</sub>

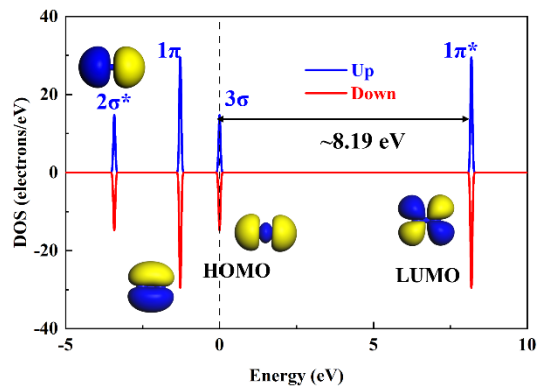

**Fig. S12** DOS and orbital analyses for N<sub>2</sub>.

From the above DOS image, it is noticed that the 3σ molecular orbital (MO) crosses the Fermi level. This image is produced by DMol<sup>3</sup> package, where the HOMO level is automatically corrected to the Fermi level. Therefore, it does not indicate that N<sub>2</sub> possesses metallic properties. Also, we did the orbital analysis shown in the above image, again evidencing the accuracy of DOS collected.

## 16. Evolution of Hirshfeld charges

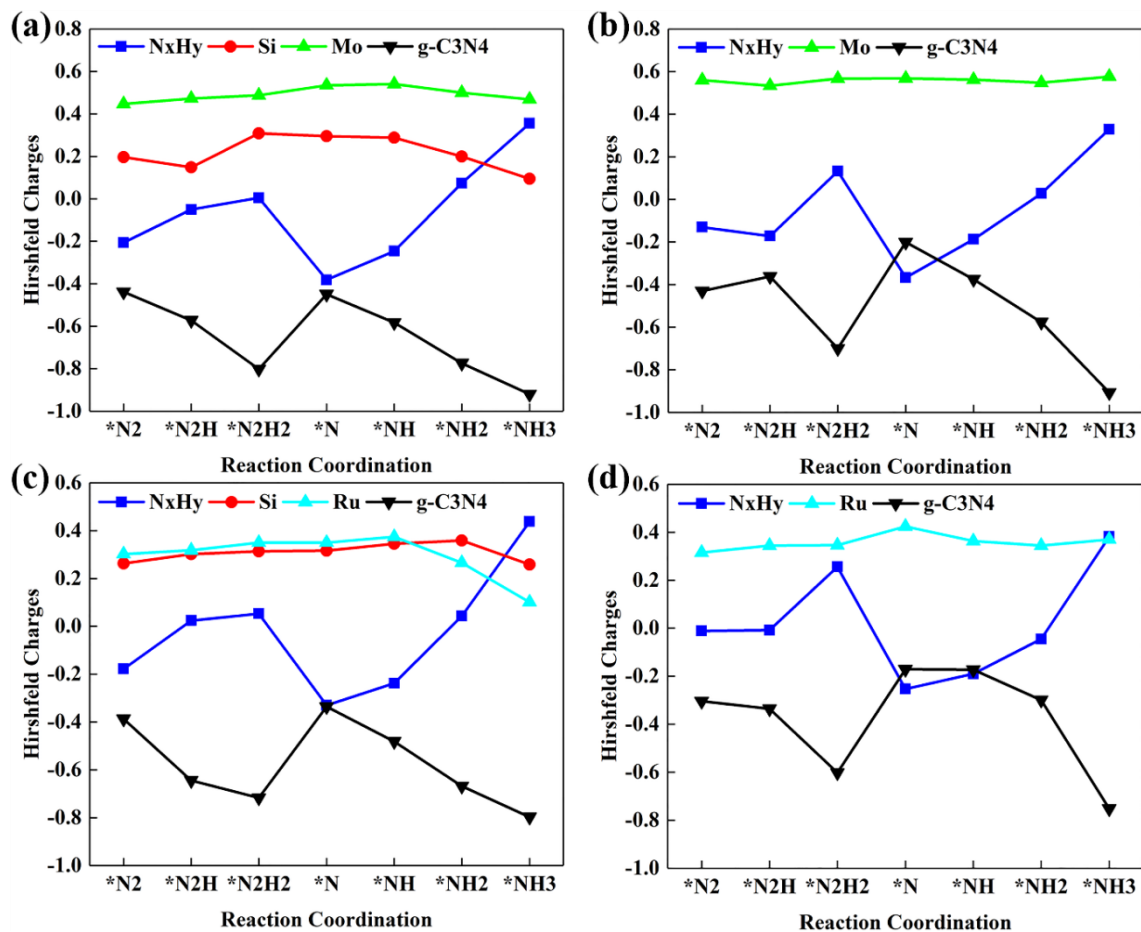

**Fig. S13** (a, c) Evolution of Hirshfeld charges on SiMo@C<sub>3</sub>N<sub>4</sub> and SiRu@C<sub>3</sub>N<sub>4</sub> along the consecutive pathways; (b, d) Evolution of Hirshfeld charges on Mo@C<sub>3</sub>N<sub>4</sub> and Ru@C<sub>3</sub>N<sub>4</sub> along the distal pathway.



## 17. Energetically favorable configuration of dual Si-M dimer catalysts

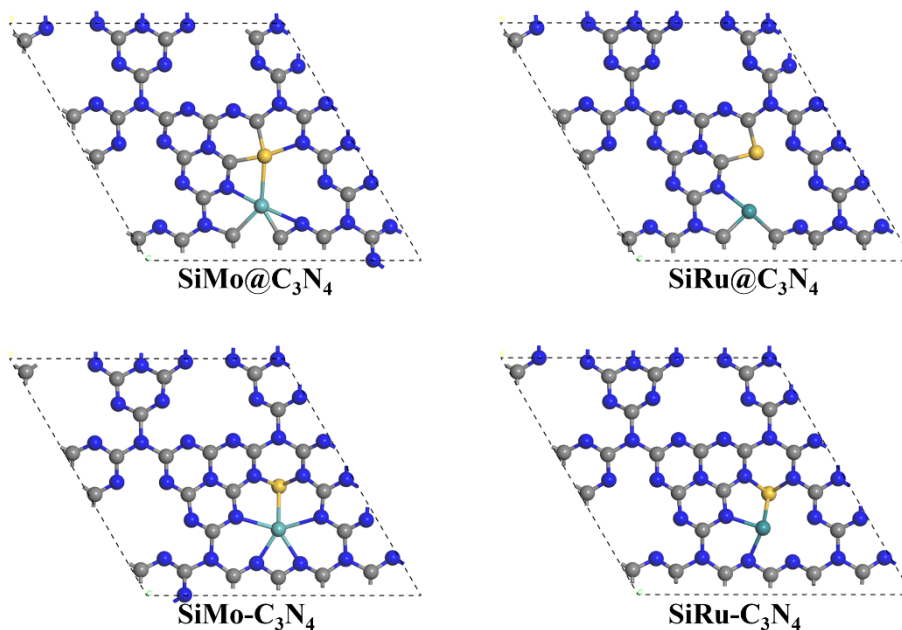

**Fig. S14** Configurations of SiMo@C<sub>3</sub>N<sub>4</sub> and SiRu@C<sub>3</sub>N<sub>4</sub> vs. SiMo-C<sub>3</sub>N<sub>4</sub> and SiRu-C<sub>3</sub>N<sub>4</sub>.

Here, we analyzed the formation energies of the above catalysts to evaluate the synthetic availability in labs. The dual-atom SiMo@C<sub>3</sub>N<sub>4</sub> and SiRu@C<sub>3</sub>N<sub>4</sub> catalysts designed by doping two dopant atoms into Nv1 vacancies are more energetically favorable than directly embedded into the hole of g-C<sub>3</sub>N<sub>4</sub>.

**Table S3** Analyses of formation energies.

| <b>Concept-catalysts</b>   | Si@C <sub>3</sub> N <sub>4</sub> | Si-C <sub>3</sub> N <sub>4</sub> | SiMo@C <sub>3</sub> N <sub>4</sub> | SiRu@C <sub>3</sub> N <sub>4</sub> | SiMo-C <sub>3</sub> N <sub>4</sub> | SiRu-C <sub>3</sub> N <sub>4</sub> |
|----------------------------|----------------------------------|----------------------------------|------------------------------------|------------------------------------|------------------------------------|------------------------------------|
| <b>Formation energy/eV</b> | -0.08                            | -0.02                            | 2.19                               | 1.36                               | 4.04                               | 3.44                               |

## 18. Thermodynamics calculated by DFT

**Table S4** Thermodynamic quantities for H<sub>2</sub>, N<sub>2</sub>, and NH<sub>3</sub> gases at standard conditions (N<sub>2</sub> + 3H<sub>2</sub> → 2NH<sub>3</sub>).

| Gases           | $E_{\text{DFT}}/\text{eV}$ | ZPE/eV | $\int C_p dT$ | TS/eV | G/eV     |
|-----------------|----------------------------|--------|---------------|-------|----------|
| H <sub>2</sub>  | -32.07                     | 0.27   | 0.09          | 0.40  | -32.11   |
| N <sub>2</sub>  | -2981.80                   | 0.15   | 0.09          | 0.59  | -2982.15 |
| NH <sub>3</sub> | -1539.82                   | 0.89   | 0.10          | 0.60  | -1539.43 |

For the gas molecules, the Gibbs free energy calculation should be performed as follows:

$$\mu = E_{\text{DFT}} + \text{ZPE} + \int C_p dT - \text{TS}, \text{ where } \mu, E, \text{ and } C_p \text{ denote the chemical potential, electronic energy, and heat capacity, respectively.}$$

**Table S5** Calculated data for ENRR.

| Intermediates                    | Catalysts (SiMo@C <sub>3</sub> N <sub>4</sub> ) |        | Catalysts (SiRu@C <sub>3</sub> N <sub>4</sub> ) |        | Catalysts (Mo@C <sub>3</sub> N <sub>4</sub> ) |        | Catalysts (Ru@C <sub>3</sub> N <sub>4</sub> ) |        |
|----------------------------------|-------------------------------------------------|--------|-------------------------------------------------|--------|-----------------------------------------------|--------|-----------------------------------------------|--------|
|                                  | <i>E</i> <sub>DFT</sub> /eV                     | ZPE/eV | <i>E</i> <sub>DFT</sub> /eV                     | ZPE/eV | <i>E</i> <sub>DFT</sub> /eV                   | ZPE/eV | <i>E</i> <sub>DFT</sub> /eV                   | ZPE/eV |
| *N <sub>2</sub>                  | -83069.63                                       | 0.20   | -83898.67                                       | 0.22   | -76683.90                                     | 0.22   | -77512.97                                     | 0.22   |
| *N <sub>2</sub> H                | -83085.84                                       | 0.55   | -83914.68                                       | 0.56   | -76699.45                                     | 0.50   | -77528.42                                     | 0.51   |
| *N <sub>2</sub> H <sub>2</sub>   | -83102.79                                       | 0.91   | -83931.17                                       | 0.91   | -76715.83                                     | 0.84   | -77544.55                                     | 0.84   |
| *N                               | -81579.12                                       | 0.11   | -82407.32                                       | 0.095  | -75192.60                                     | 0.10   | -76020.32                                     | 0.09   |
| *NH                              | -81595.77                                       | 0.40   | -82425.16                                       | 0.43   | -75209.12                                     | 0.37   | -76037.32                                     | 0.36   |
| *NH <sub>2</sub>                 | -81612.72                                       | 0.53   | -82442.03                                       | 0.75   | -75225.72                                     | 0.68   | -76054.91                                     | 0.70   |
| *NH <sub>3</sub>                 | -81629.54                                       | 1.08   | -82457.92                                       | 0.90   | -75242.59                                     | 1.06   | -76071.55                                     | 1.08   |
| *NHNH                            | -83102.39                                       | 0.86   | -83931.14                                       | 0.86   | -76715.42                                     | 0.86   | -77544.53                                     | 0.66   |
| *NHNH <sub>2</sub>               | -83118.94                                       | 1.22   | -83947.86                                       | 1.24   | -76732.20                                     | 0.99   | -77561.17                                     | 1.18   |
| *NH <sub>2</sub> NH <sub>2</sub> | -83135.28                                       | 1.37   | -83963.92                                       | 1.38   | -76748.51                                     | 1.54   | -77577.83                                     | 1.34   |
